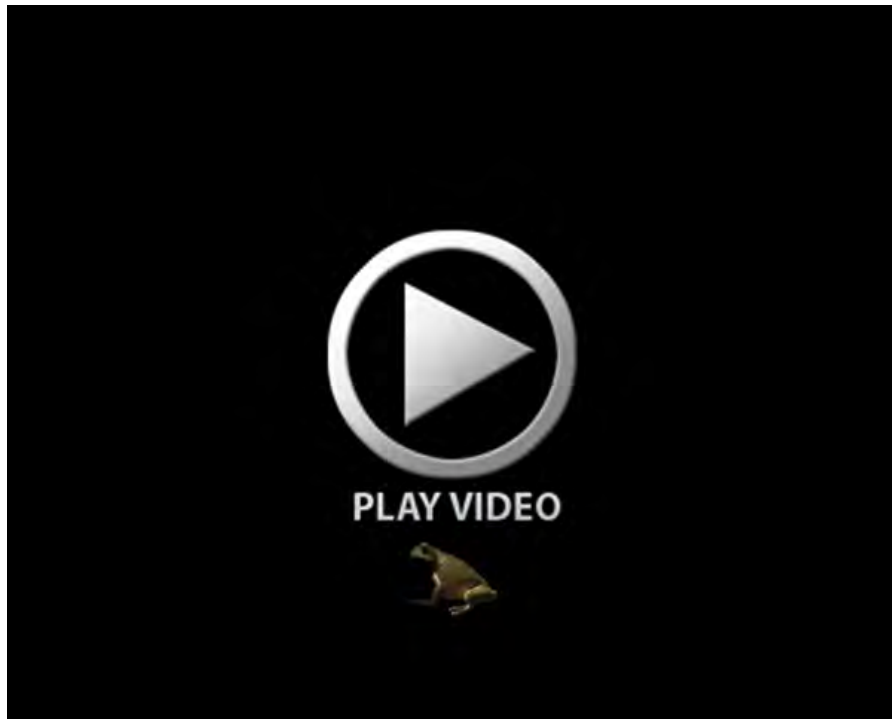

**Movie 1. Example video playback stimulus.** Movie shows one of the video playback stimuli used in the single-monitor experiments. This particular stimulus depicts a male with a medium gray vocal sac, average vocal sac size and average vocal sac extension duration of 1 s. Note that this is the animation as it appeared prior to monitor adjustment; the actual animation presented to females thus differed somewhat in appearance (see Materials and methods for details of monitor adjustment and playback stimuli).
